# Supplementary material for: A novel computational biostatistics approach implies impaired dephosphorylation of growth factor receptors as associated with severity of autism
Source: PubMed Central journal article supplement (PMC3905234; doi:10.1038/tp.2013.124), 2014-01-28

Supplementary Information

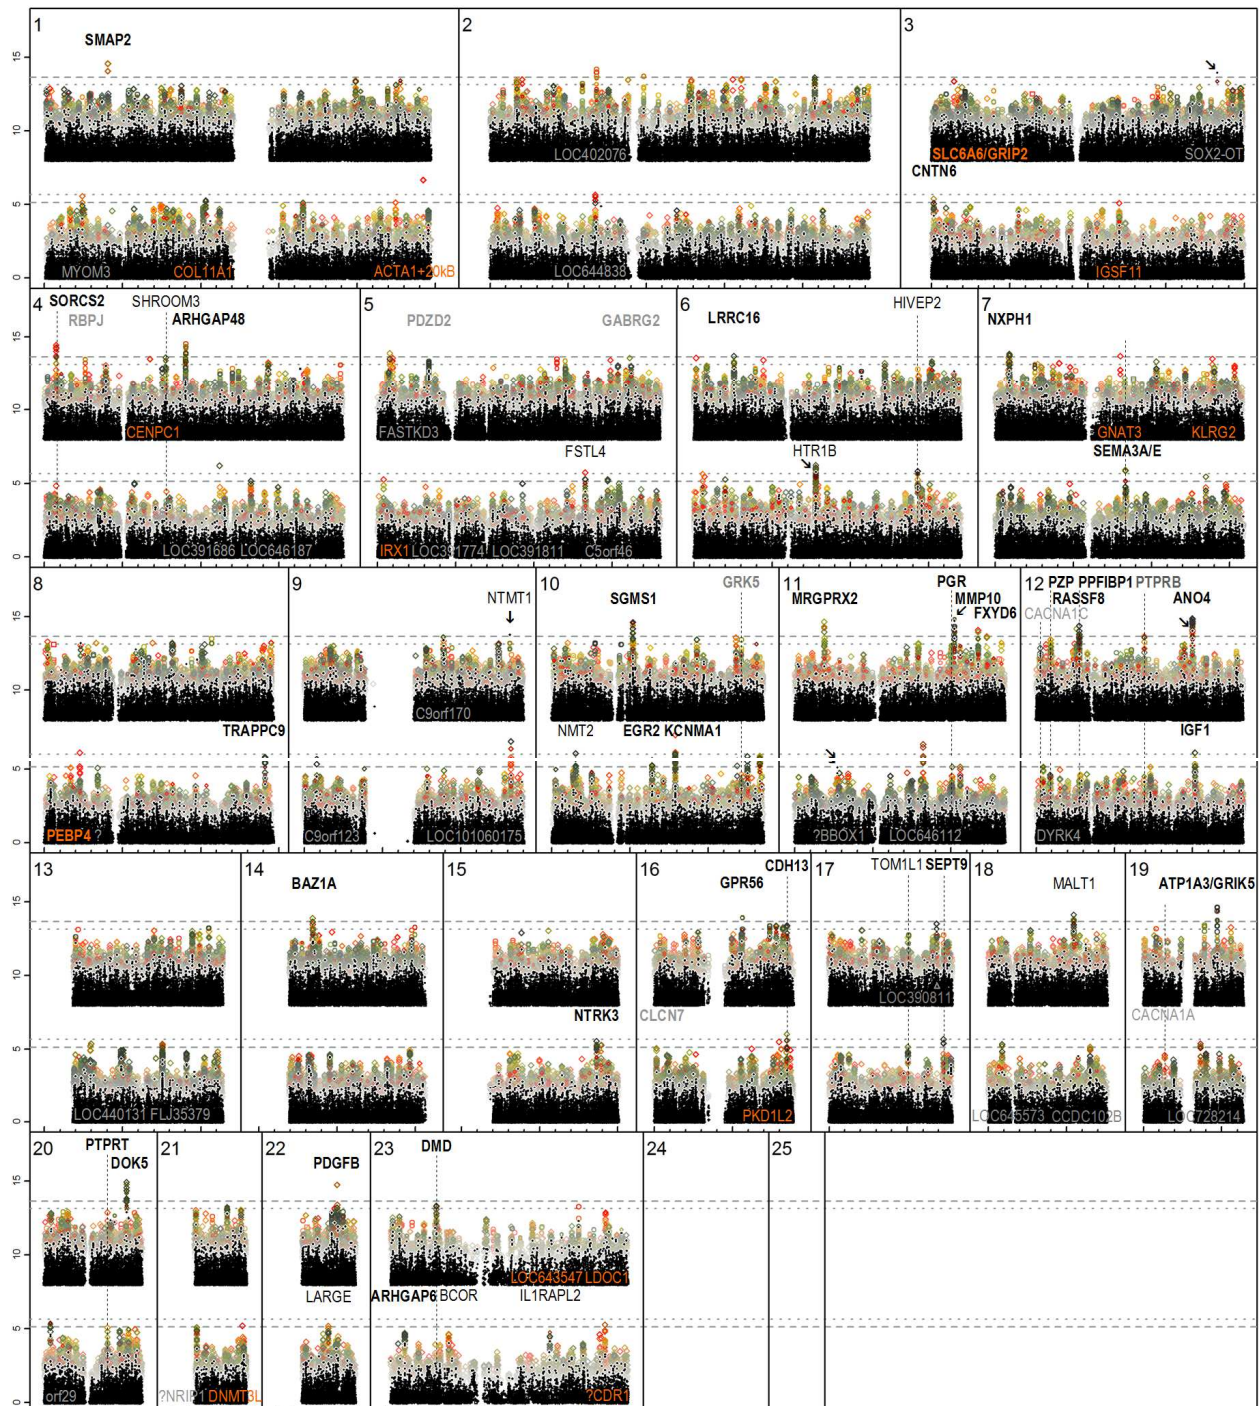

**Supplementary Figure 1: μGWAS Manhattan plot.** Top: AGP I, bottom: AGP II. The top 20 genes in either Stage are labeled in black, as are the top 11 genes by joint significance (s+, see Supplementary Table 1, connected by vertical dashed lines). Genes related to the Ras/Ca<sup>2+</sup> pathway are highlighted in bold. Dots in regions primarily significant in male or female cases are shown as squares and circles, respectively. Results shown in red have low reliability ( $\mu C$ )<sup>20</sup>, names in gray indicate additional genes of potential interest, space permitting.

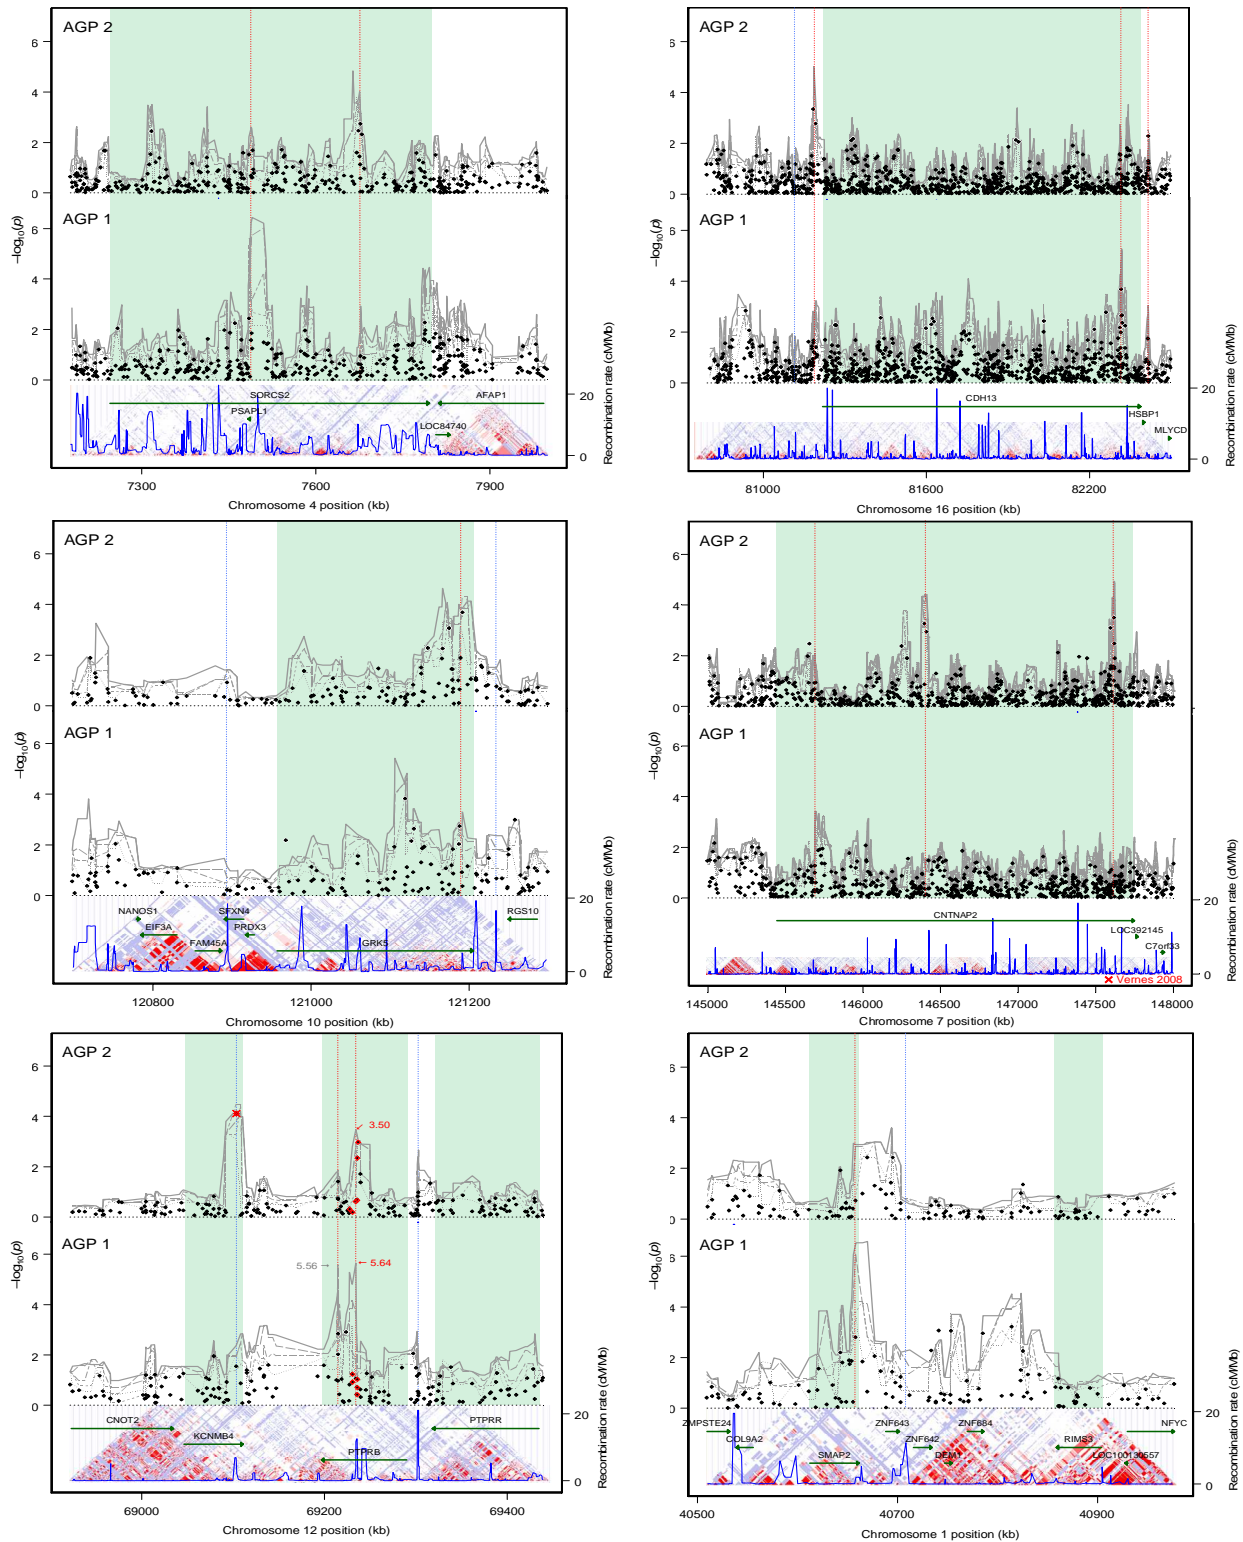

**Supplementary Figure 2: Wide-locus Manhattan plots of selected highly significant regions.** The regions most consistently significant in both Stages are *SORCS2* (10<sup>th</sup>/36<sup>th</sup>, 11.28), *CDH13* (44<sup>th</sup>/25<sup>th</sup>, 10.26), and *GRK5* (35<sup>th</sup>/59<sup>th</sup>, 10.06); see Figure 3 for *PTPRT* (90<sup>th</sup>/20<sup>th</sup>, 9.95); see Supplementary Figure 1 for *PGR* (65<sup>th</sup>/18<sup>th</sup>, 10.17) and *PZP* (33<sup>rd</sup>/93<sup>rd</sup>, 9.94). *KCNMB4* exemplifies a region dominated by a single SNP, with two other PTPR, *PTPRB* (21<sup>st</sup>/880<sup>th</sup>, 9.11) and *PTPRR*, nearby. See the text for a discussion of *RIMS3* vs. *SMAP2* (8<sup>th</sup> in AGP I, 6.59) and *CNTNAP2* (28<sup>th</sup> in AGP II, 4.93). Legend: see Figure 3 for details.



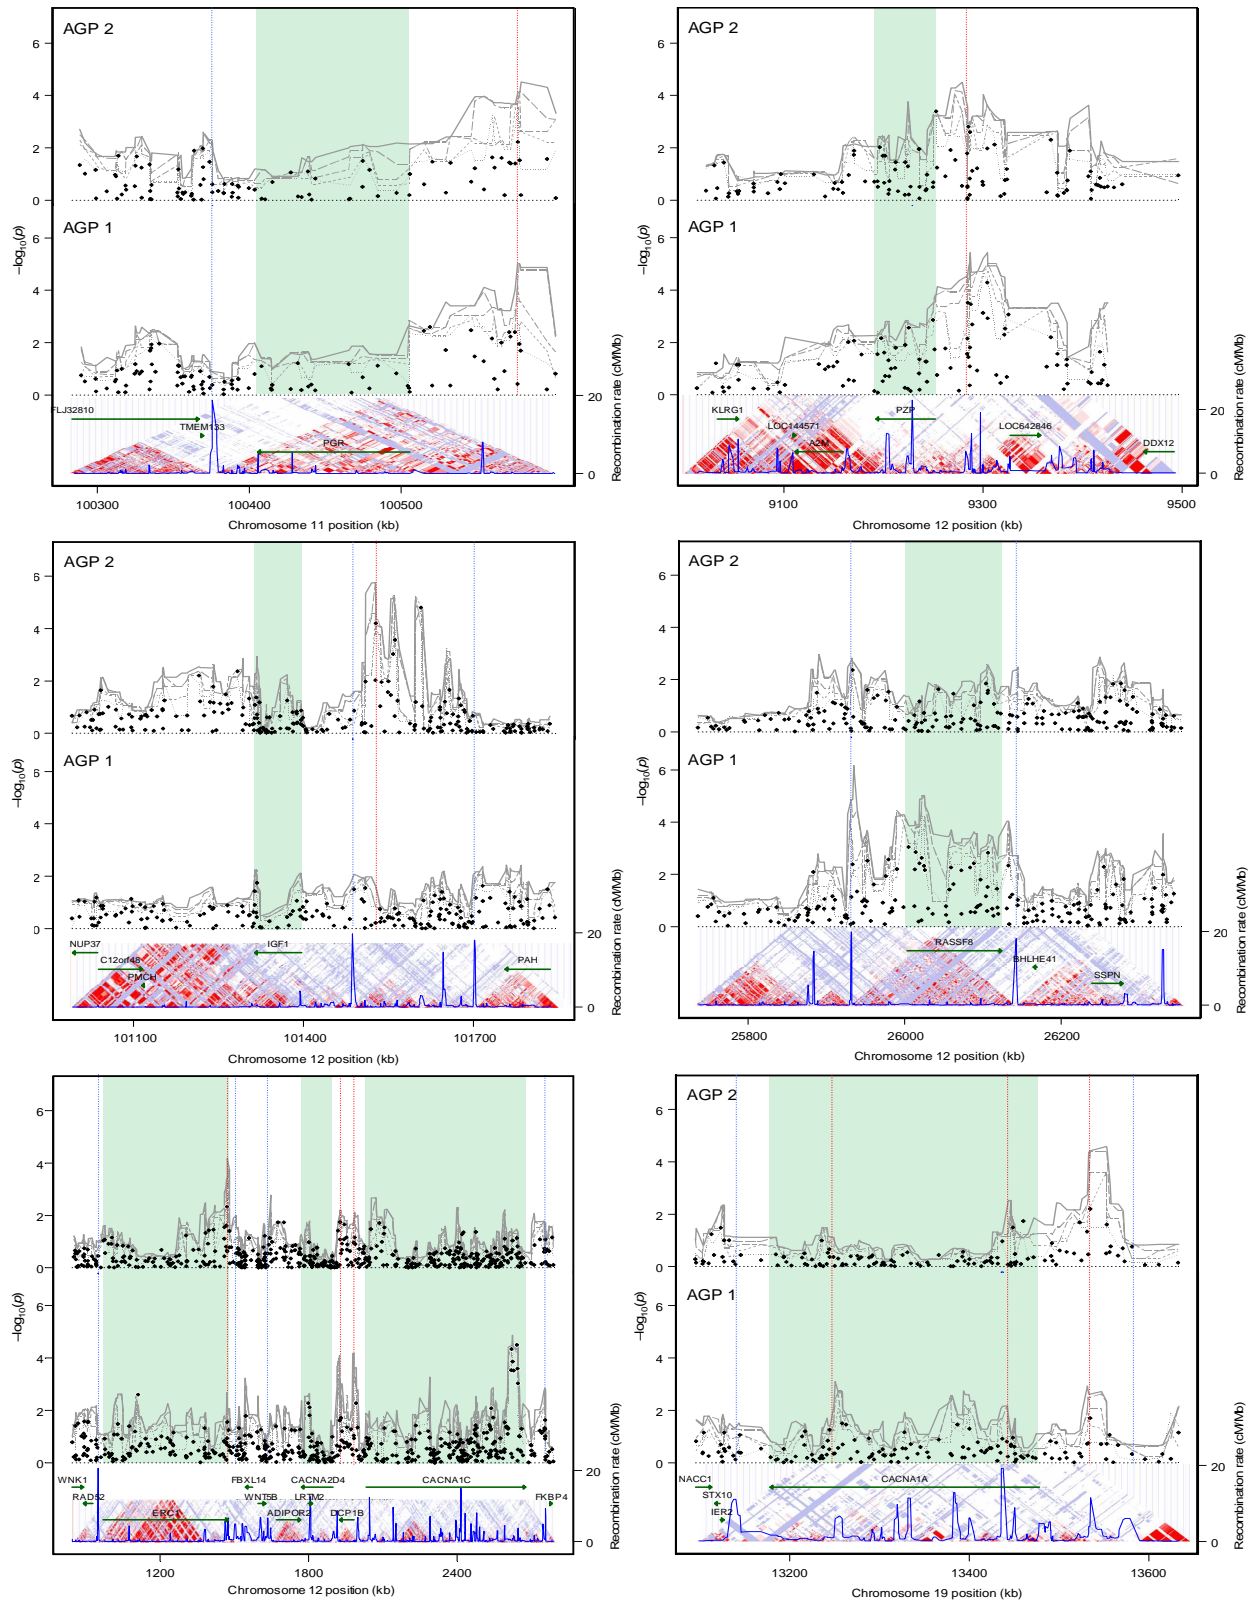

**Supplementary Figure 3: Wide-locus Manhattan plots of regions with variations in the promoter region. *PGR*, *PZP*, *IGF1*, *RASSF8*, *CACNA2D4/CACNA1C*, *CACNA1A*; Legend: see Figure 3 for details.**

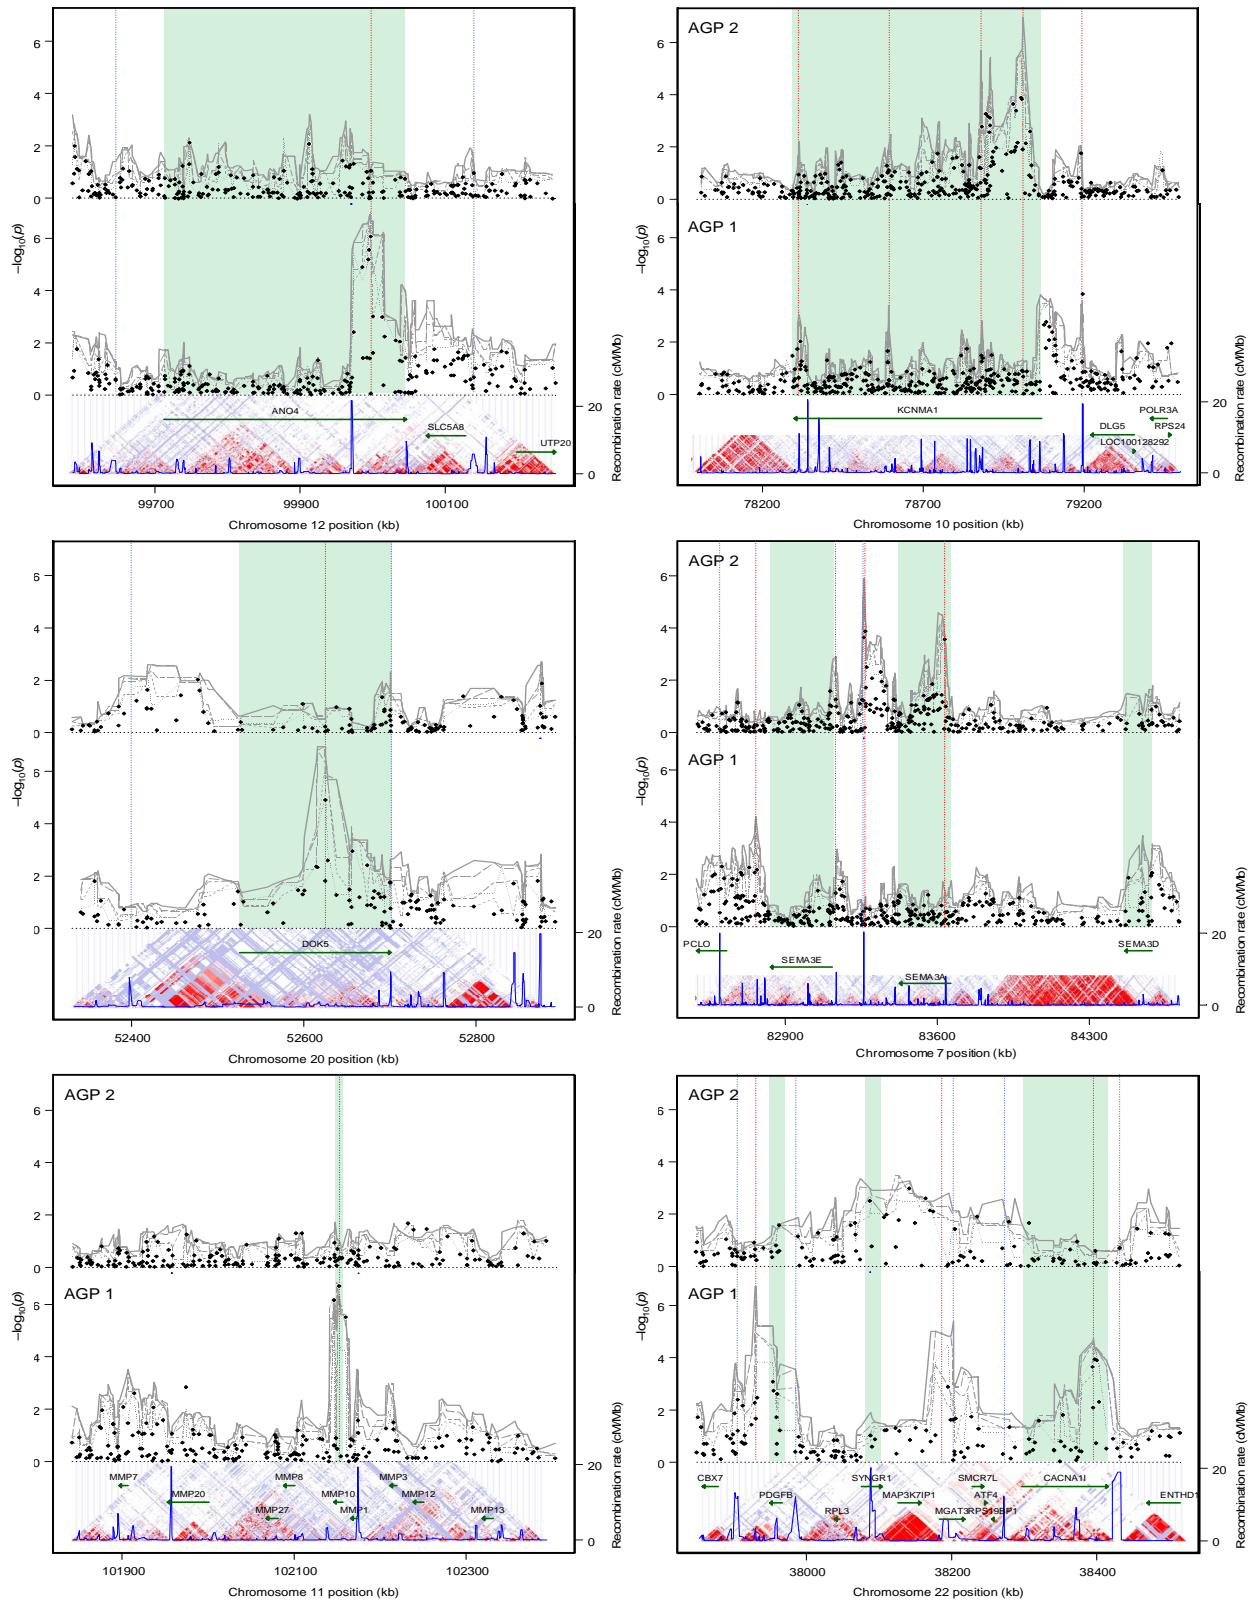

**Supplementary Figure 4: Wide-locus Manhattan plots of most significant regions in AGP I (*ANO4*, *DOK5*, *MMP10*, *PDGFB*) and AGP II (*KCNMA1*, *SEMA3A/SEMA3E*)** Legend: see Figure 3 for details.



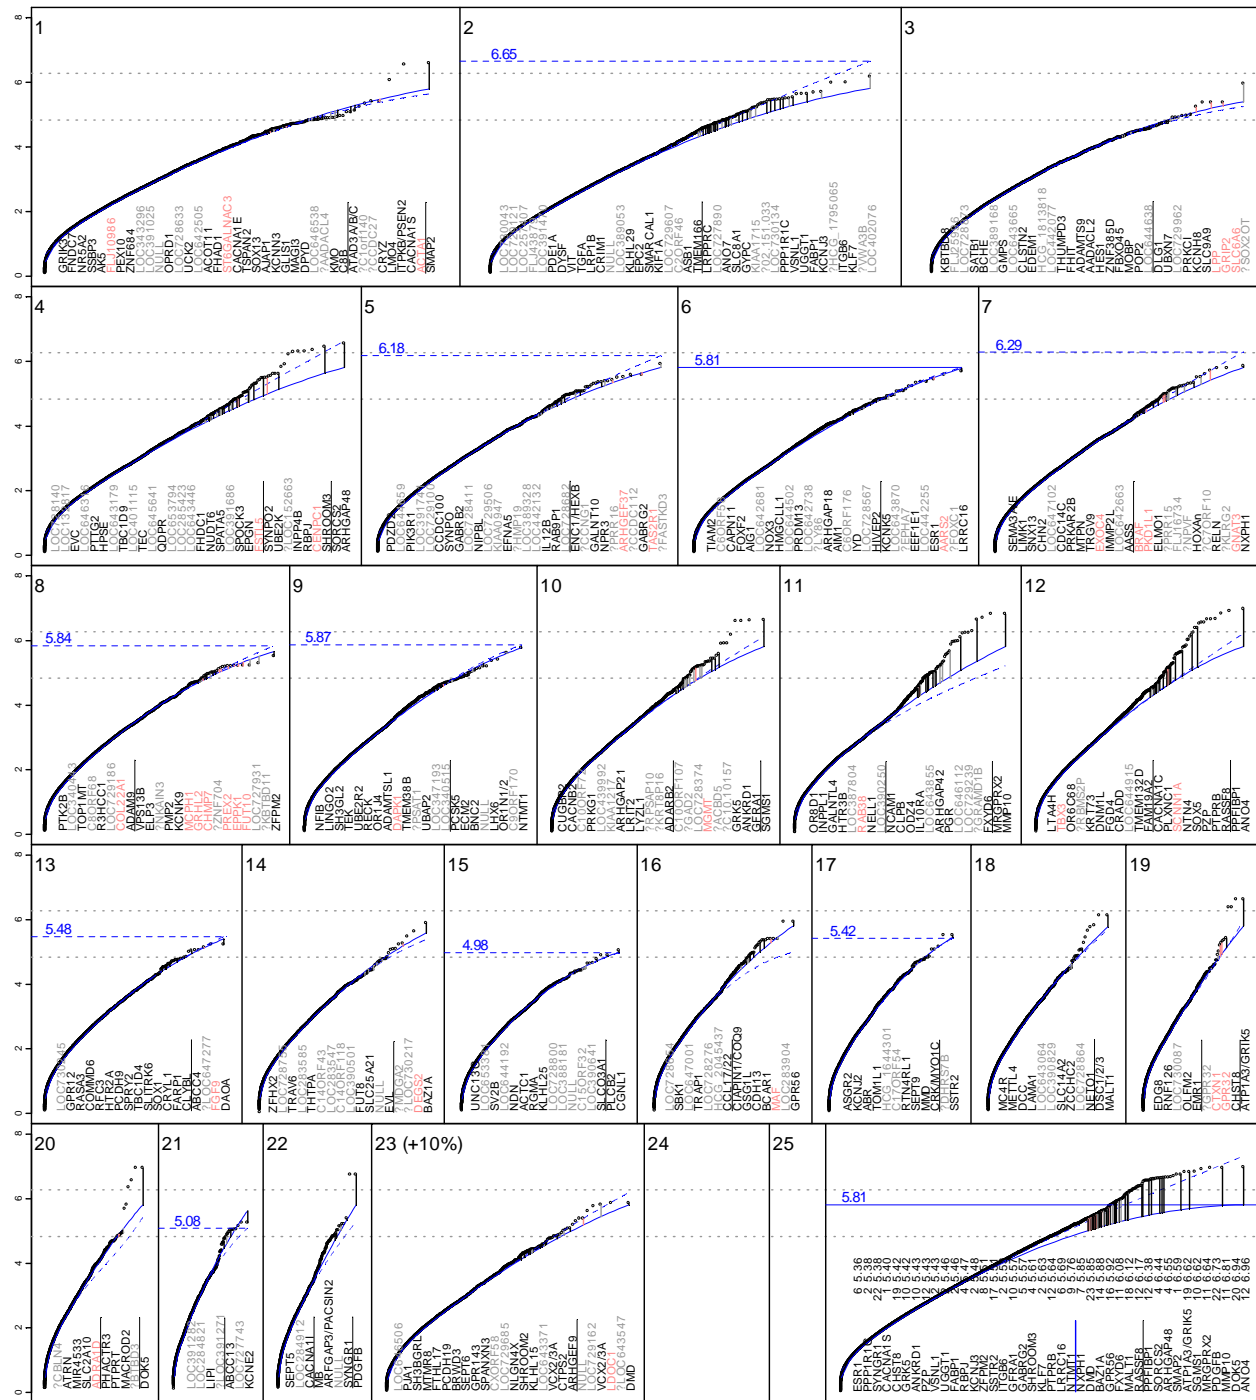

**Supplementary Figure 5:  $\mu$ GWAS quantile-rank (QR) plot, AGP I.** Each dot represents the most significant result among all diplotypes centered at the same SNP ranked by significance (low to high). Dashed blue curves: loess projection under the null hypothesis. Dashed blue lines: upper limit among the ten chromosomes with the best fit of the projection to the observed s-values. Solid blue line: median cut-off selected among the dashed lines. Solid blue curves: loess projection fitted to the endpoint of the median of the above ten upper limits (see Methods for details, here: chromosome 6, as indicated in the WG plot). ... (continued on Supplementary Figure 4)

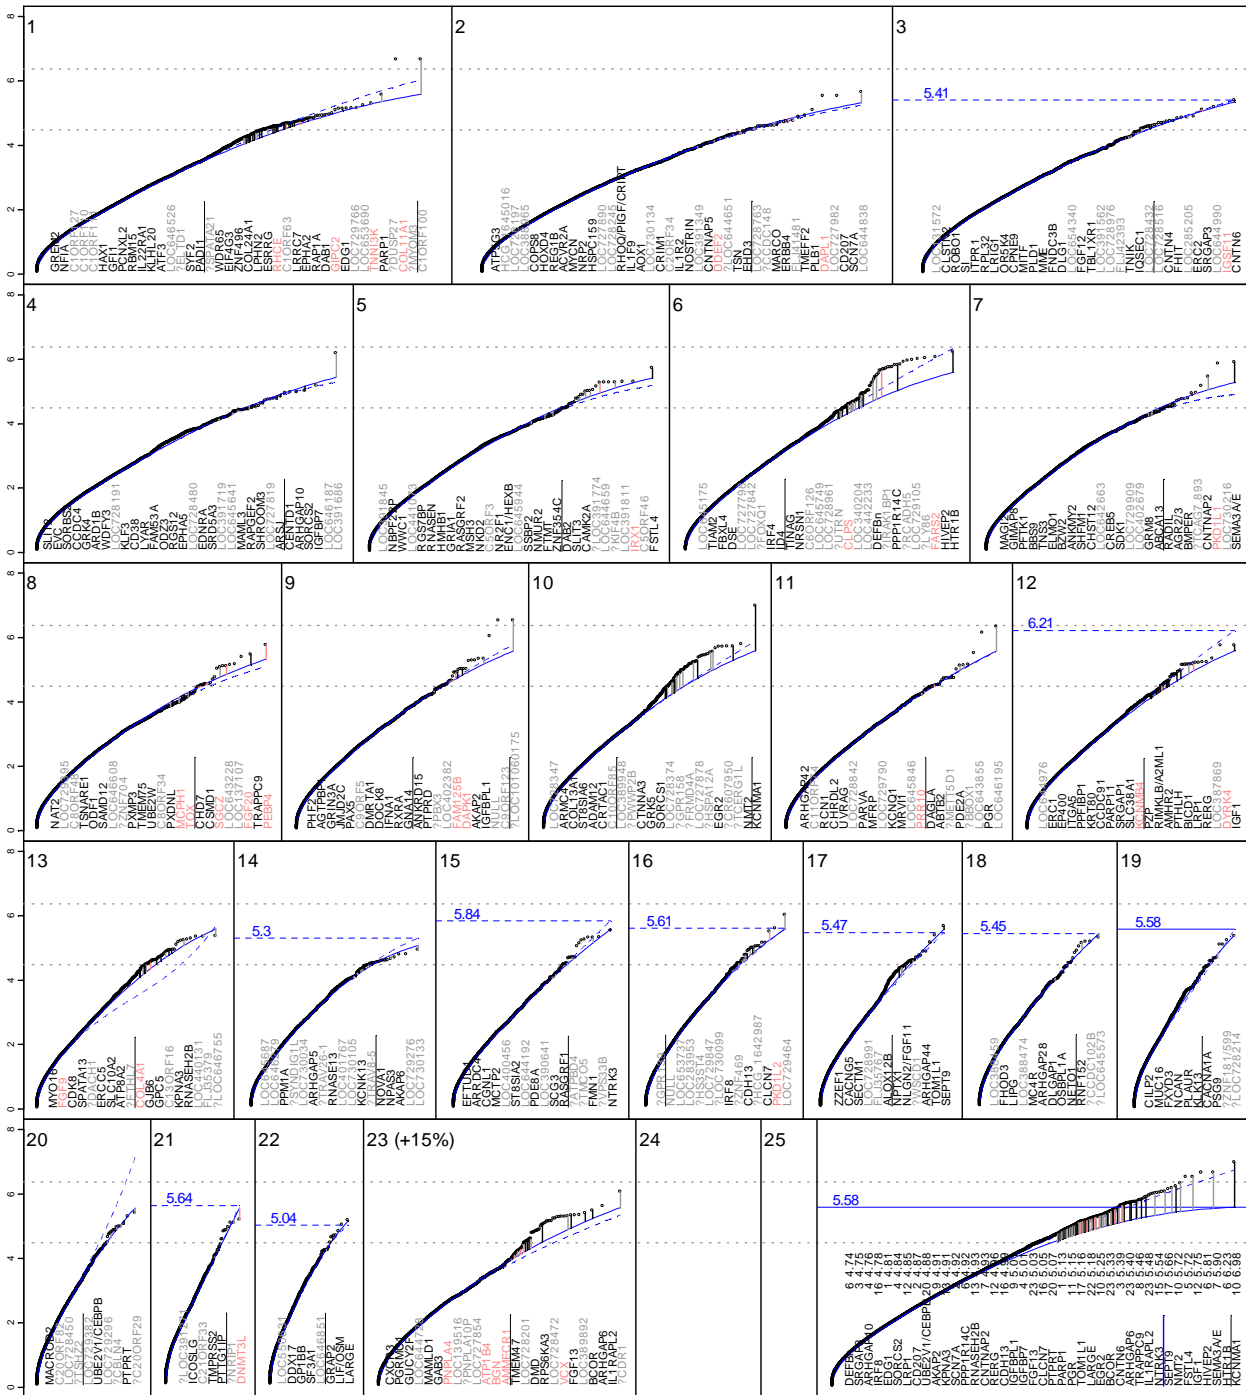

**Supplementary Figure 6:  $\mu$ GWAS quantile-rank (QR) plot, AGP II (SDA vs. HFA).** (continued from Supplementary Figure 5) ... Vertical lines connect the most significant  $s$ -values ( $-\log_{10} p$ ) of a gene (dot) with its expected value (solid blue line). Individual chromosomes: Light gray and red names and corresponding vertical lines indicate genes with unknown function and results with low reliability (either low  $\mu$ IC or reliance on a single SNP), respectively. Gene names preceded by “?” refer to regions in distant LD blocks. Whole genome gene list (by significance, right to left) includes chromosome number and  $s$ -value; excludes genes with unknown function or low reliability.

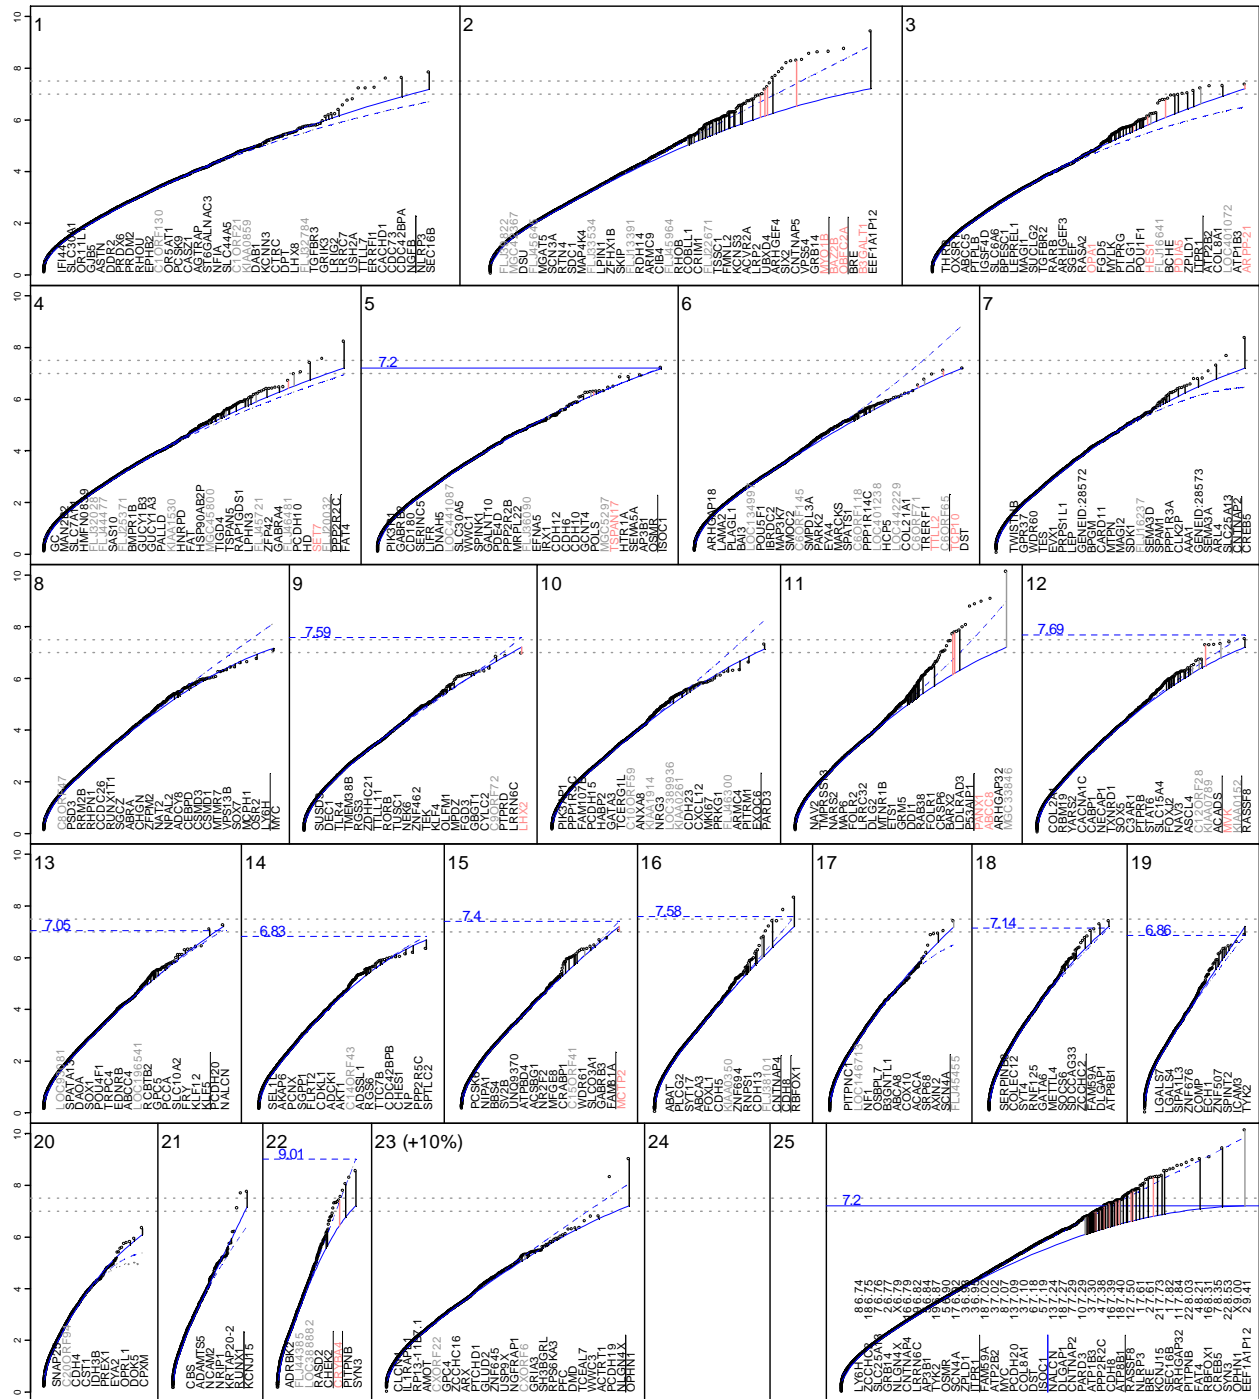

Supplementary Figure 7:  $\mu$ GWAS quantile-rank (QR) plot, CAE<sup>20</sup>. (see Supplementary Figure 5 and Supplementary Figure 6 for legend)



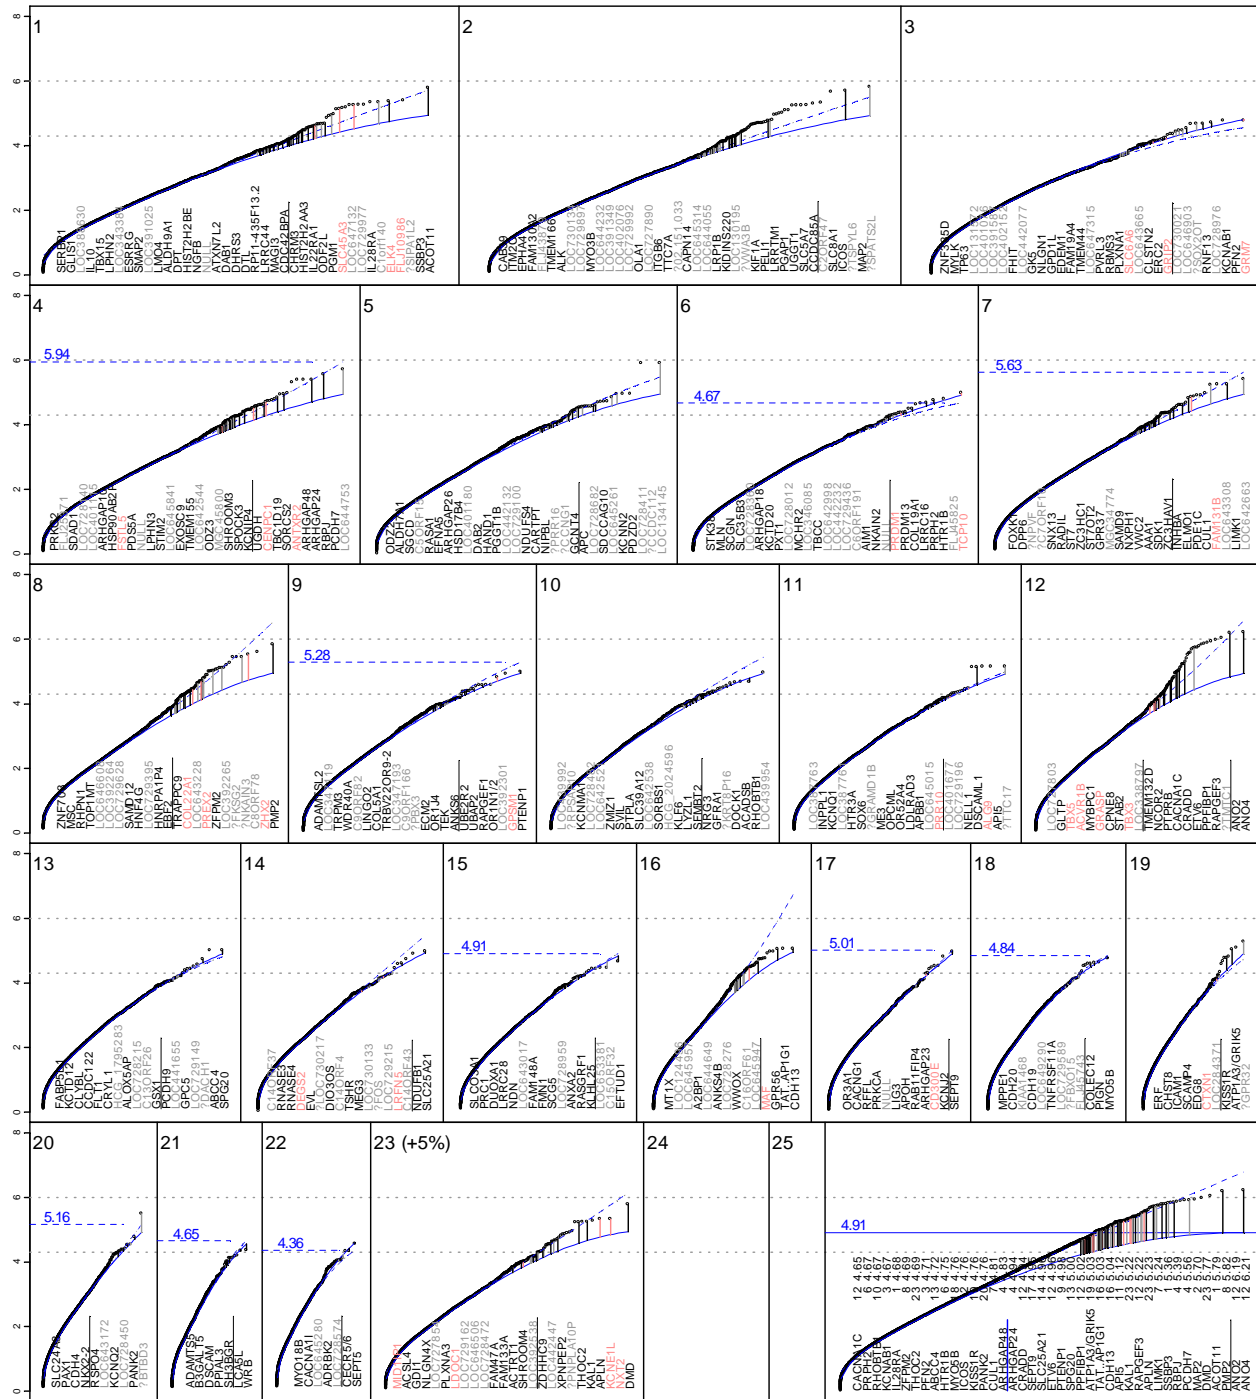

Supplementary Figure 8:  $\mu$ GWAS quantile-rank (QR) plot, AGP I (HFA vs. all parental controls). (see Supplementary Figure 5 and Supplementary Figure 6 for legend)

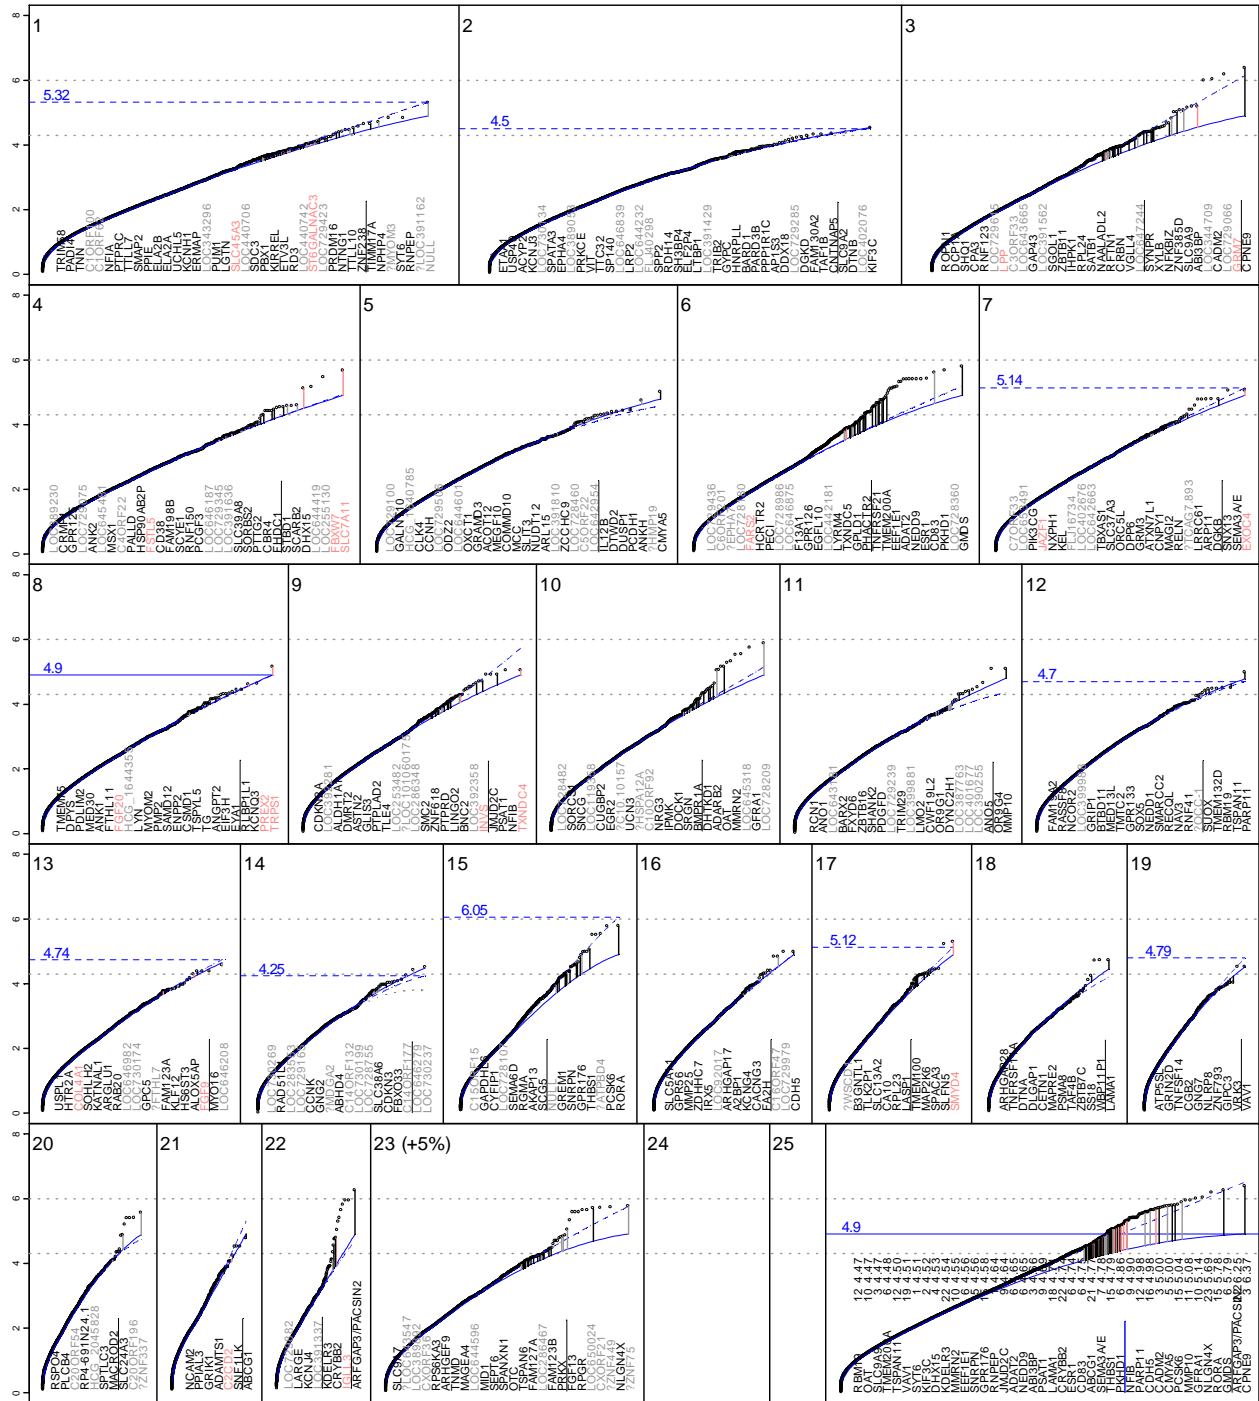

**Supplementary Figure 9: μGWAS quantile-rank (QR) plot, AGP I (SDA vs. all parental controls).** (see Supplementary Figure 5 and Supplementary Figure 6 for legend)

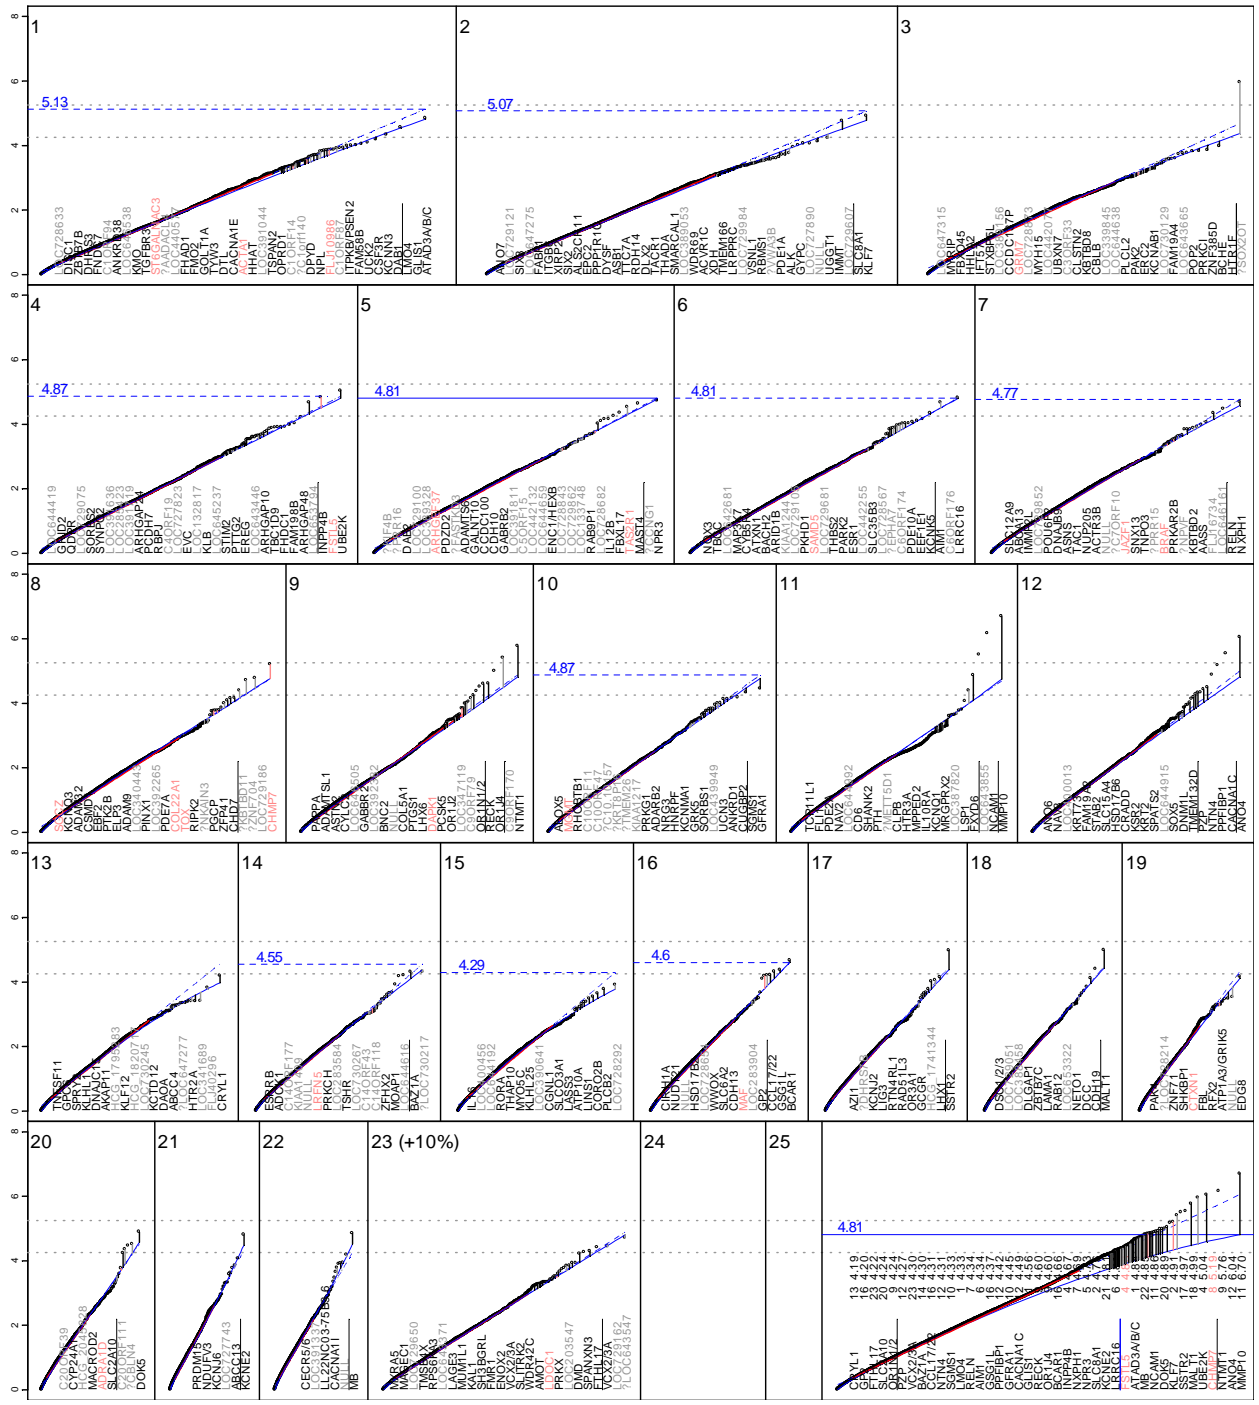

**Supplementary Figure 10: ssGWAS quantile-rank (QR) plot, AGP I.** (see Supplementary Figure 5 and Supplementary Figure 6 for legend)



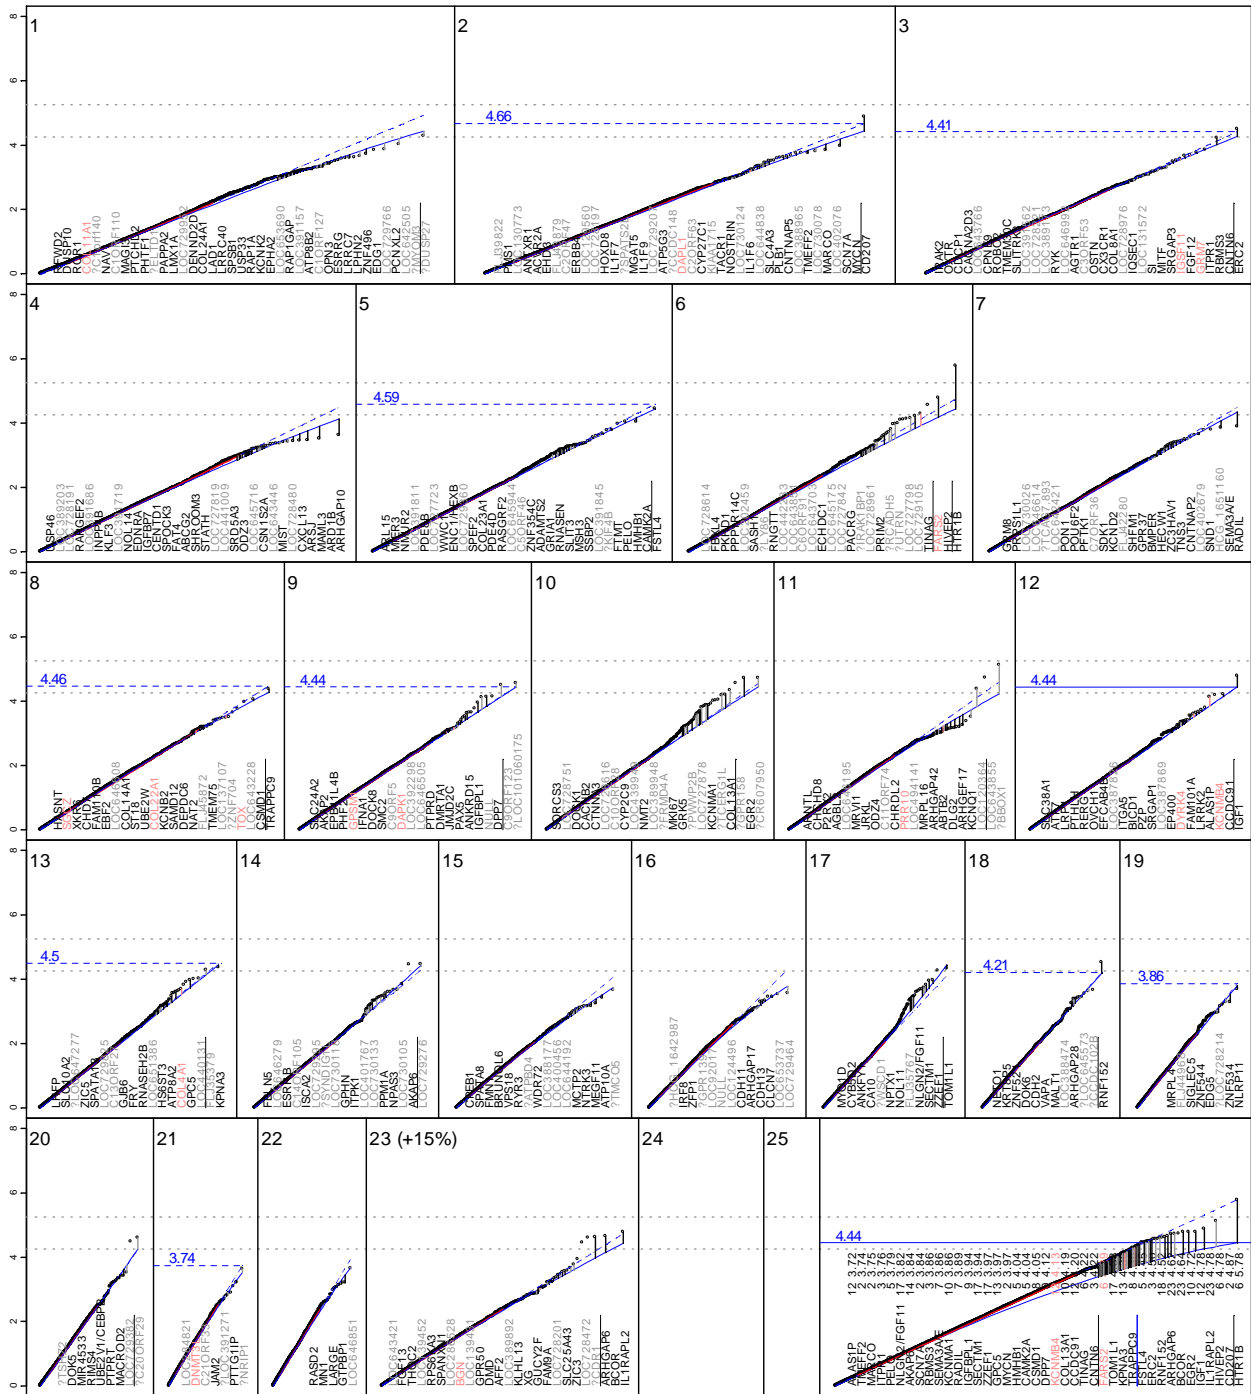

**Supplementary Figure 11: ssGWAS quantile-rank (QR) plot, AGP II.** (see Supplementary Figure 5 and Supplementary Figure 6 for legend)



**Supplementary Table 1:** Top 100 regions by  $\mu$ GWAS in AGP I (left) and AGP II (right) and most closely related genes in SFARI Gene. s:  $-\log_{10}(p)$ , sF: Fisher( $S_{AGP I}$ ,  $S_{AGP II}$ ). Genes highlighted through color coding are included in Figure 2, top and center, for AGP I and AGP II, respectively.

| Seq | Chr | Coordinate  | Gene         | Entrez s | 55 SFARI | sF | Match | sF   | Chr  | Coordinate | Gene        | Entrez s     | 46 SFARI |       |
|-----|-----|-------------|--------------|----------|----------|----|-------|------|------|------------|-------------|--------------|----------|-------|
| 1   | 12  | 99,997,403  | ANO4         | 121601   | 6.964    | 1  |       | 795  | 9.38 | 10         | 79,013,206  | KCNMA1       | 3778     | 6.979 |
| 2   | 20  | 52,616,118  | DOK5         | 55816    | 6.940    | 1  |       | 9.29 | 497  | 6          | 77,822,690  | HTR1B        | 3351     | 6.227 |
| 3   | 11  | 102,149,811 | MMP10        | 4319     | 6.812    | 1  |       |      |      | 7          | 83,262,044  | SEMA3AVE     |          | 5.901 |
| 4   | 22  | 37,929,247  | PDGFB        | 5155     | 6.733    | 1  |       |      |      | 6          | 143,054,474 | HIVEP2       | 3097     | 5.811 |
| 5   | 11  | 19,034,480  | MRGPRX2      | 117194   | 6.636    | 1  |       |      |      | 12         | 101,519,877 | IGF1         | 3479     | 5.747 |
| 6   | 10  | 51,827,941  | SGMS1        | 259230   | 6.625    | 1  |       |      |      | 5          | 132,800,280 | FSTL4        | 23105    | 5.719 |
| 7   | 19  | 47,234,675  | ATP1A3/GRIK5 | 6.621    | 1        |    |       |      |      | 10         | 15,240,566  | NMT2         | 9397     | 5.717 |
| 8   | 1   | 40,670,079  | SMAP2        | 64744    | 6.587    | 1  |       |      |      | 17         | 73,082,372  | SEPT9        | 10801    | 5.665 |
| 9   | 4   | 90,290,720  | ARHGAP48     | 10144    | 6.546    | 1  |       |      |      | 15         | 86,391,117  | NTRK3        | 4916     | 5.536 |
| 10  | 4   | 7,490,276   | SORCS2       | 57537    | 6.443    | 1  |       | 9.85 | 36   | 23         | 104,381,002 | IL1RAPL2     | 26280    | 5.477 |
| 11  | 12  | 27,522,647  | PPFIBP1      | 5792     | 6.376    | 1  |       | 9.17 | 197  | 8          | 141,190,927 | TRAPPC9      | 83696    | 5.464 |
| 12  | 12  | 25,934,704  | RASSF8       | 11228    | 6.168    | 1  |       |      |      | 23         | 11,618,552  | ARHGAP6      | 395      | 5.400 |
| 13  | 18  | 54,617,513  | MALT1        | 10892    | 6.118    | 1  |       | 8.24 | 841  | 3          | 1,297,885   | CNTN6        | 27255    | 5.391 |
| 14  | 11  | 117,236,346 | FXYP6        | 53826    | 6.084    | 1  |       |      |      | 23         | 39,778,167  | BCOR         | 54880    | 5.327 |
| 15  | 16  | 56,212,982  | GPR56        | 9289     | 5.924    | 1  |       | 8.20 | 620  | 10         | 64,115,570  | EGR2         | 1959     | 5.247 |
| 16  | 14  | 34,407,116  | BAZ1A        | 11177    | 5.878    | 1  |       |      |      | 22         | 32,339,001  | LARGE        | 9215     | 5.183 |
| 17  | 23  | 31,989,875  | DMD          | 1756     | 5.852    | 1  |       | 8.97 | 88   | 17         | 50,320,792  | TOM1L1       | 10040    | 5.158 |
| 18  | 7   | 9,128,496   | NXPH1        | 30010    | 5.846    | 1  |       |      |      | 11         | 100,603,405 | PGR          | 5241     | 5.149 |
| 19  | 9   | 131,397,657 | NTMT1        | 28989    | 5.765    | 1  |       |      |      | 1          | 224,760,165 | PARP1        | 142      | 5.129 |
| 20  | 6   | 25,533,505  | LRRIC16A     | 55604    | 5.689    | 1  |       | 9.0  | 8.57 | 20         | 40,415,101  | PTPRT        | 11122    | 5.066 |
| 21  | 12  | 69,234,337  | PTPRB        | 5787     | 5.644    | 1  |       | 7.77 | 880  | 16         | 1,428,647   | CLCN7        | 1186     | 5.048 |
| 22  | 2   | 207,729,186 | KLF7         | 8609     | 5.634    | 1  |       |      |      | 23         | 137,452,143 | FGF13        | 2258     | 5.034 |
| 23  | 4   | 77,587,494  | SHROOM3      | 57619    | 5.607    | 1  |       | 8.66 | 109  | 4          | 57,601,443  | IGFBP7       | 3490     | 5.009 |
| 24  | 5   | 161,378,809 | GABRG2       | 2566     | 5.574    | 1  |       |      |      | 9          | 38,399,081  | IGFBP1       | 347252   | 5.007 |
| 25  | 10  | 117,851,287 | GFRA1        | 2674     | 5.568    | 1  |       |      |      | 16         | 81,186,530  | CDH13        | 1012     | 4.989 |
| 26  | 2   | 160,611,093 | ITGB6        | 3694     | 5.530    | 1  |       |      |      | 12         | 15,210,855  | RERG         | 85004    | 4.963 |
| 27  | 17  | 68,662,948  | SSTR2        | 6752     | 5.511    | 1  |       | 6.26 | 7.54 | 13         | 50,372,054  | RNAHEH2B     | 79624    | 4.933 |
| 28  | 8   | 106,945,510 | ZFPM2        | 23414    | 5.509    | 1  |       |      |      | 7          | 147,621,670 | CNTNAP2      | 26047    | 4.933 |
| 29  | 2   | 155,276,308 | KCNJ3        | 3760     | 5.485    | 1  |       |      |      | 6          | 150,653,078 | PPP1R14C     | 81706    | 4.917 |
| 30  | 4   | 26,069,146  | RBPJ         | 3516     | 5.473    | 1  |       |      |      | 2          | 166,951,683 | SCN7A        | 6332     | 4.915 |
| 31  | 2   | 88,209,949  | FABP1        | 2168     | 5.464    | 1  |       |      |      | 13         | 49,154,441  | KPNA3        | 3839     | 4.909 |
| 32  | 2   | 128,649,230 | UGGT1        | 56886    | 5.455    | 1  |       |      |      | 9          | 111,968,951 | AKAP2        | 11217    | 4.908 |
| 33  | 2   | 17,261,376  | VSNL1        | 7447     | 5.433    | 1  |       |      |      | 20         | 48,236,776  | UBE2V1/CEBPB | 4        | 4.880 |
| 34  | 12  | 9,304,709   | PZP          | 5858     | 5.432    | 1  |       | 8.56 | 93   | 2          | 70,913,619  | CD207        | 50489    | 4.873 |
| 35  | 10  | 92,773,493  | ANKRD1       | 27063    | 5.427    | 1  |       |      |      | 12         | 55,817,899  | LRP1         | 4035     | 4.851 |
| 36  | 10  | 121,106,202 | GRK5         | 2869     | 5.424    | 1  |       | 8.68 | 59   | 10         | 7,663,672   | SORCS2       | 57537    | 4.836 |
| 37  | 19  | 38,835,881  | CHST8        | 64377    | 5.415    | 1  |       |      |      | 4          | 101,517,409 | EDG1         | 1901     | 4.813 |
| 38  | 1   | 199,196,628 | CACNA1S      | 779      | 5.403    | 1  |       |      |      | 16         | 84,506,772  | IRF8         | 3394     | 4.775 |
| 39  | 22  | 38,202,646  | SYNGR1       | 9145     | 5.385    | 1  |       | 7.53 | 871  | 6          | 149,401,007 | ARHGAP10     | 79658    | 4.762 |
| 40  | 2   | 182,684,972 | PPP1R1C      | 151242   | 5.377    | 1  |       |      |      | 3          | 9,225,949   | SRGAP3       | 9901     | 4.752 |
| 41  | 6   | 152,134,442 | ESR1         | 2099     | 5.359    | 1  |       |      |      | 6          | 50,119,755  | DEFB110      | 245913   | 4.745 |
| 42  | 16  | 73,793,655  | BCAR1        | 9564     | 5.348    | 1  |       |      |      | 11         | 72,008,094  | PDE2A        | 5138     | 4.733 |
| 43  | 5   | 32,781,509  | NPR3         | 4883     | 5.346    | 1  |       |      |      | 13         | 90,936,596  | GPC5         | 2262     | 4.712 |
| 44  | 7   | 103,231,266 | RELN         | 5649     | 5.334    | 1  |       |      |      | 2          | 28,653,279  | PLB1         | 151056   | 4.707 |
| 45  | 16  | 82,318,009  | CDH13        | 1012     | 5.266    | 1  |       | 8.86 | 25   | 399        | 7.56        | 1            | 1600     | 4.704 |
| 46  | 21  | 34,514,668  | KCNE2        | 9992     | 5.252    | 1  |       |      |      | 15         | 30,874,881  | FMN1         | 342184   | 4.700 |
| 47  | 4   | 143,143,541 | INPP4B       | 8821     | 5.252    | 1  |       |      |      | 10         | 108,270,642 | SORCS1       | 114815   | 4.686 |
| 48  | 13  | 104,999,215 | DAOA         | 267012   | 5.221    | 1  |       |      |      | 1          | 112,049,488 | RAP1A        | 5906     | 4.681 |
| 49  | 9   | 124,344,571 | OR1N1/2      |          | 5.184    | 1  |       |      |      | 3          | 55,645,960  | ERC2         | 26059    | 4.680 |
| 50  | 7   | 27,168,814  | HOXA1        | 3198     | 5.162    | 1  |       |      |      | 19         | 48,464,142  | PSG9         | 5678     | 4.674 |
| 51  | 12  | 24,436,518  | SOX5         | 6660     | 5.158    | 1  |       |      |      | 1          | 16,294,597  | EPHA2        | 1969     | 4.673 |
| 52  | 12  | 94,801,931  | NTN4         | 59277    | 5.145    | 1  |       | 7.39 | 698  | 1          | 69,932,766  | LRRIC7       | 57554    | 4.673 |
| 53  | 1   | 224,967,038 | ITPKB/PSEN2  |          | 5.113    | 1  |       |      |      | 11         | 34,268,213  | ABTB2        | 25841    | 4.664 |
| 54  | 2   | 127,232,976 | GYPC         | 2995     | 5.077    | 1  |       |      |      | 22         | 28,968,226  | LIF/OSM      | 4        | 4.659 |
| 55  | 23  | 8,286,488   | VCX2/3A      |          | 5.077    | 1  |       | 7.33 | 691  | 5          | 149,613,148 | CAMK2A       | 815      | 4.651 |
| 56  | 4   | 39,378,484  | UBE2K        | 3093     | 5.074    | 1  |       |      |      | 1          | 214,906,994 | ESRRG        | 2104     | 4.651 |
| 57  | 6   | 8,016,561   | EEF1E1       | 9521     | 5.072    | 1  |       |      |      | 1          | 82,331,131  | LPHN2        | 23266    | 4.641 |
| 58  | 18  | 26,927,892  | DSC1/2/3     |          | 5.063    | 1  |       | 7.52 | 452  | 12         | 32,394,809  | BICD1        | 636      | 4.640 |
| 59  | 9   | 124,019,951 | LHX6         | 26468    | 5.061    | 1  |       |      |      | 10         | 121,166,591 | GRK5         | 2869     | 4.639 |
| 60  | 5   | 153,782,557 | GALNT10      | 55568    | 5.061    | 1  |       |      |      | 12         | 28,074,553  | PTHLH        | 5744     | 4.623 |
| 61  | 1   | 87,518,905  | LMO4         | 8543     | 5.059    | 1  |       | 7.36 | 634  | 4          | 35,682,788  | CENTD1       | 116984   | 4.618 |
| 62  | 12  | 93,321,870  | PLXNC1       | 10154    | 5.041    | 1  |       | 7.30 | 690  | 13         | 19,745,138  | GJB6         | 10804    | 4.616 |
| 63  | 15  | 55,638,868  | CGNL1        | 84952    | 5.037    | 1  |       | 7.70 | 305  | 2          | 192,529,143 | TMEFF2       | 23671    | 4.615 |
| 64  | 2   | 40,527,812  | SLC8A1       | 6546     | 5.036    | 1  |       |      |      | 17         | 12,793,117  | ARHGAP44     | 9912     | 4.613 |
| 65  | 13  | 94,633,879  | ABCC4        | 10257    | 5.027    | 1  |       |      |      | 10         | 67,799,789  | CTNNA3       | 29119    | 4.608 |
| 66  | 11  | 100,576,775 | PGR          | 5241     | 5.023    | 1  |       | 8.78 | 18   | 14         | 31,921,296  | AKAP6        | 9472     | 4.603 |
| 67  | 8   | 140,422,530 | KCNK9        | 51305    | 5.022    | 1  |       |      |      | 14         | 32,511,542  | NPAS3        | 64067    | 4.602 |
| 68  | 21  | 14,650,668  | ABCC13       | 150000   | 5.018    | 1  |       |      |      | 12         | 52,121,210  | AMHR2        | 269      | 4.599 |
| 69  | 11  | 100,237,862 | ARHGAP42     | 143872   | 5.006    | 1  |       | 7.75 | 249  | 12         | 8,841,975   | RIMKL1/A2ML1 | 4        | 4.592 |
| 70  | 11  | 117,335,639 | IL10RA       | 3587     | 4.992    | 1  |       |      |      | 3          | 60,481,389  | FHIT         | 2272     | 4.592 |
| 71  | 2   | 241,715,503 | ANO7         | 50636    | 4.992    | 1  |       |      |      | 2          | 212,873,037 | ERBB4        | 2066     | 4.592 |
| 72  | 3   | 144,628,258 | SLC9A9       | 285195   | 4.980    | 1  |       |      |      | 17         | 7,344,666   | NLGN2/FGF11  | 4        | 4.589 |
| 73  | 7   | 36,936,699  | ELMO1        | 9844     | 4.970    | 1  |       | 7.69 | 262  | 19         | 13,552,951  | CACNA1A      | 773      | 4.586 |
| 74  | 16  | 27,875,165  | GSG1L        | 146395   | 4.956    | 1  |       |      |      | 17         | 76,055,642  | NPTX1        | 4884     | 4.586 |
| 75  | 3   | 19,557,427  | KCNH8        | 131096   | 4.954    | 1  |       |      |      | 5          | 168,682,315 | SLIT3        | 6586     | 4.586 |
| 76  | 3   | 171,304,895 | PRKCI        | 5584     | 4.949    | 1  |       |      |      | 1          | 86,185,610  | COL24A1      | 255631   | 4.582 |
| 77  | 1   | 74,930,706  | CRY2         | 1429     | 4.923    | 1  |       |      |      | 1          | 245,526,979 | ZNF496       | 84838    | 4.578 |
| 78  | 22  | 41,553,146  | ARFGAP3      | 26286    | 4.922    | 1  |       | 8.37 | 7.06 | 3          | 2,402,611   | ONTN4        | 152330   | 4.575 |
| 79  | 20  | 15,095,150  | MACROD2      | 140733   | 4.913    | 1  |       | 7.85 | 155  | 23         | 20,492,176  | RPS6KA3      | 6197     | 4.575 |
| 80  | 9   | 16,618,828  | BNC2         | 54796    | 4.913    | 1  |       |      |      | 2          | 119,441,621 | MARCO        | 8685     | 4.572 |
| 81  | 8   | 28,059,736  | ELP3         | 55140    | 4.913    | 1  |       | 7.13 | 766  | 1          |             |              |          |       |



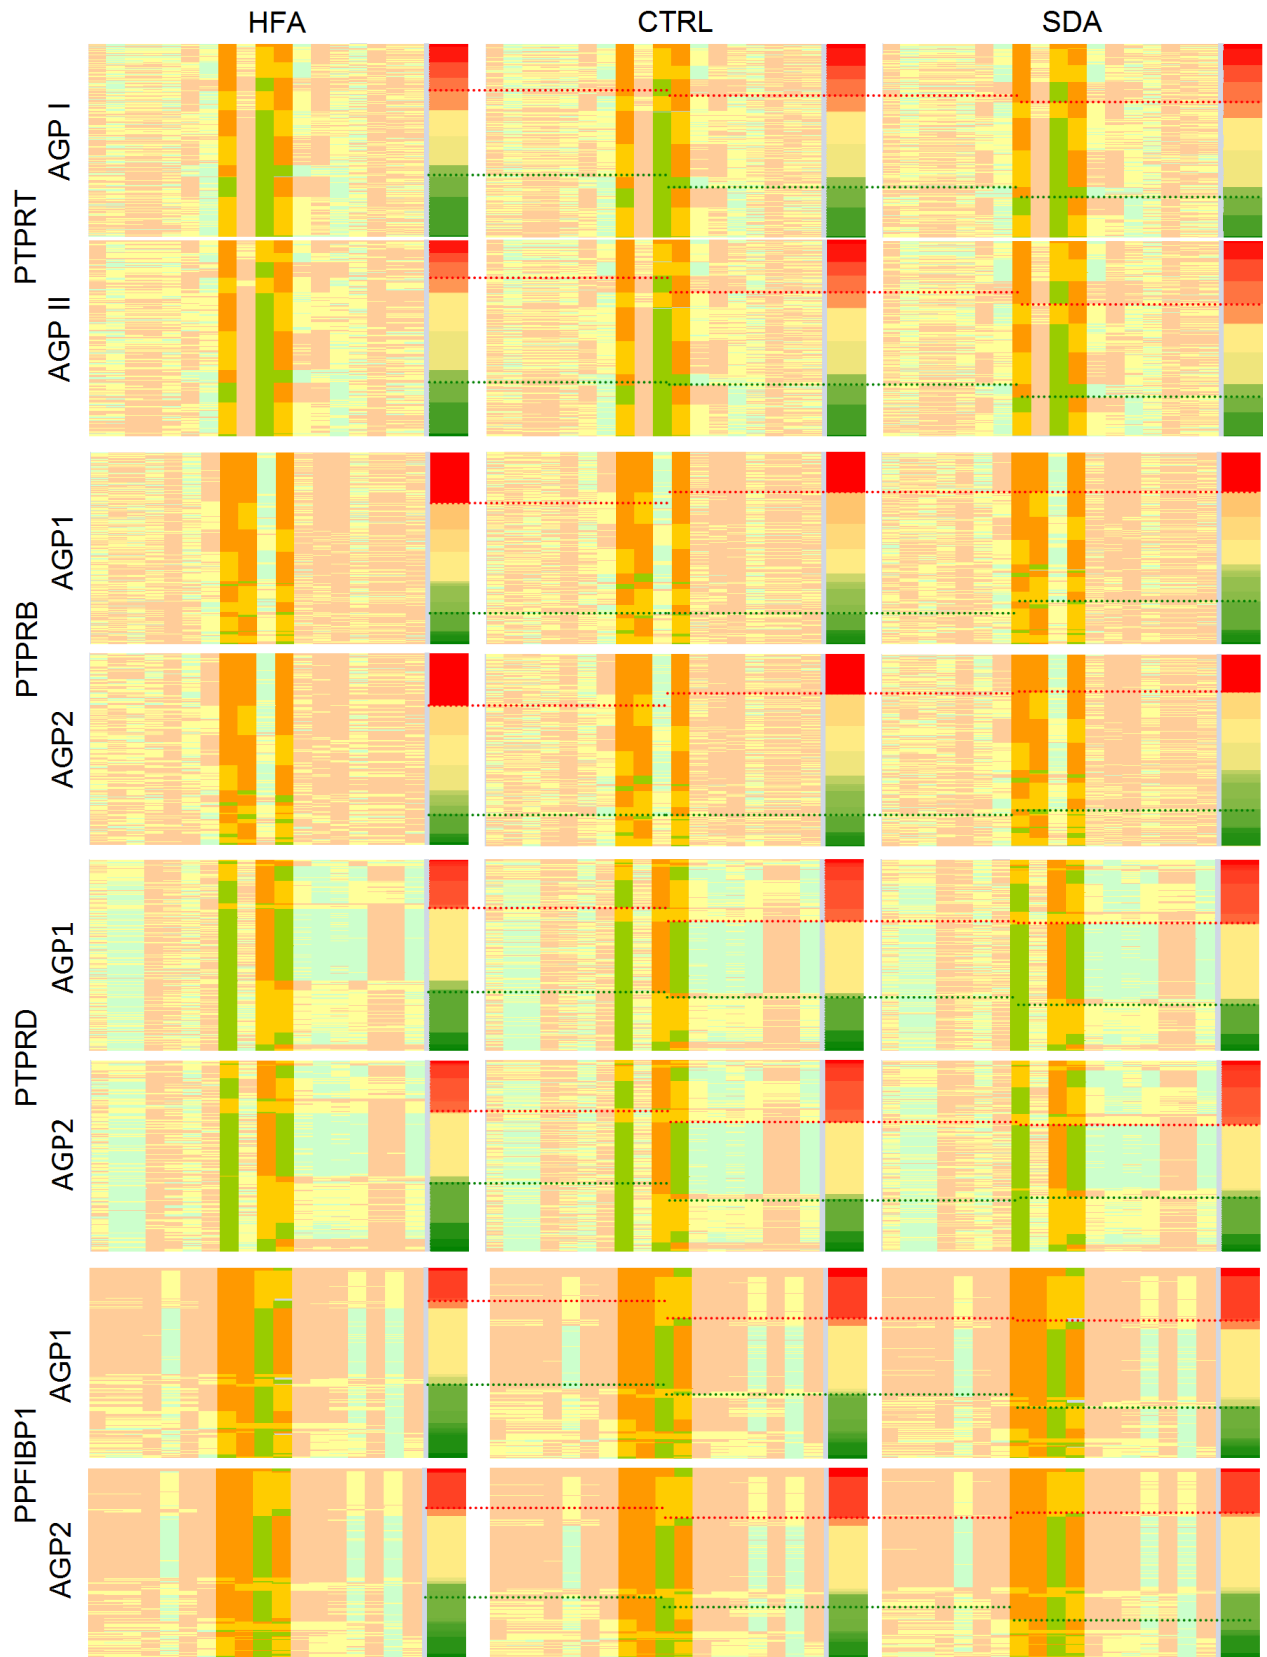

**Supplementary Figure 13: Comparison of SDA and HFA cases with melanoma controls.** *PTPRT*: rs6102794, -rs6072694, and rs6102795; *PTPRB*: rs4761222, rs2303963, and rs2116211; *PTPRD*-rs4742447, rs7020466, -rs6477258; *PPFIBP1*: rs411432, rs374484, -rs411816, rs6487610. See Figure 4 for legend.

**Supplementary Table 2: Enrichment of Most Significant Regions With Functionally Related Genes.** Heuristical enrichment was determined based on the top 200 regions (see Supplementary Table 1 for the first 100). (As the structure of the particular network configuration is highly variable, the focus here is on stability of enrichment within a given structure.) Network results (yellow): Networks are based on direct relationships, using human and mouse information with at least high confidence, excluding miRNA data bases. Based on gaps in score/number of focus molecules (highlighted in dark yellow), the top one or two networks are shown. Annotation results (gray): Groups of genes by functional annotation were chosen based on reported p-values a sorting criterion. For regions of size >20, sets of n < 4 molecules were excluded to avoid artifacts, as were sets of n > 60 molecules for lack of specificity. The most consistent gene sets by functional annotation (AGP I: Schizophrenia, AGP II: neurogenesis) are highlighted as boxed.

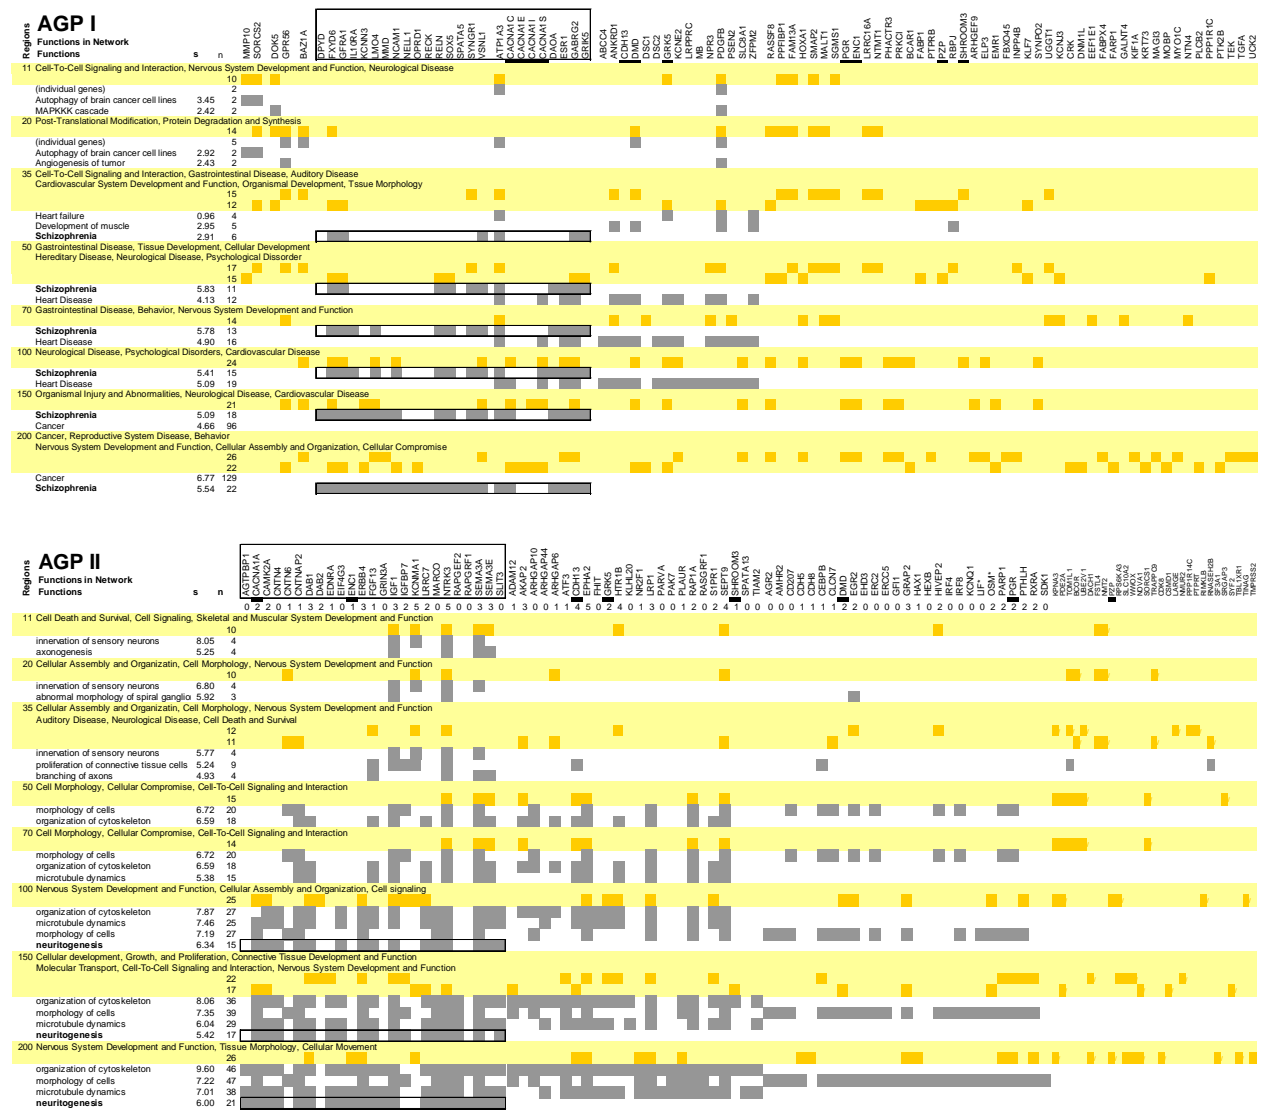

Supplement: tp2013124x1.pdf [file tp2013124x1.pdf]
